# Supplementary material for: LDA-promoted asymmetric synthesis of β-trifluoromethyl-β-amino indanone derivatives with virtually complete stereochemical outcome
Source: Royal Society of Chemistry journal article supplement (doi:10.1039/c3ra45773g), 2013-11-25

# Supporting Information

## LDA-promoted asymmetric synthesis of $\beta$ -trifluoromethyl- $\beta$ -amino indanone derivatives with virtually complete stereochemical outcome

Chen Xie,<sup>a</sup> Haibo Mei,<sup>a,b</sup> Lingmin Wu,<sup>a</sup> Vadim A. Soloshonok,<sup>c,d</sup>

Jianlin Han,<sup>\*a,b</sup> and Yi Pan<sup>a</sup>

## NMR spectra of compounds **3** and **4**.

$^1\text{H}$  NMR and  $^{13}\text{C}$  NMR spectrum of **3a**

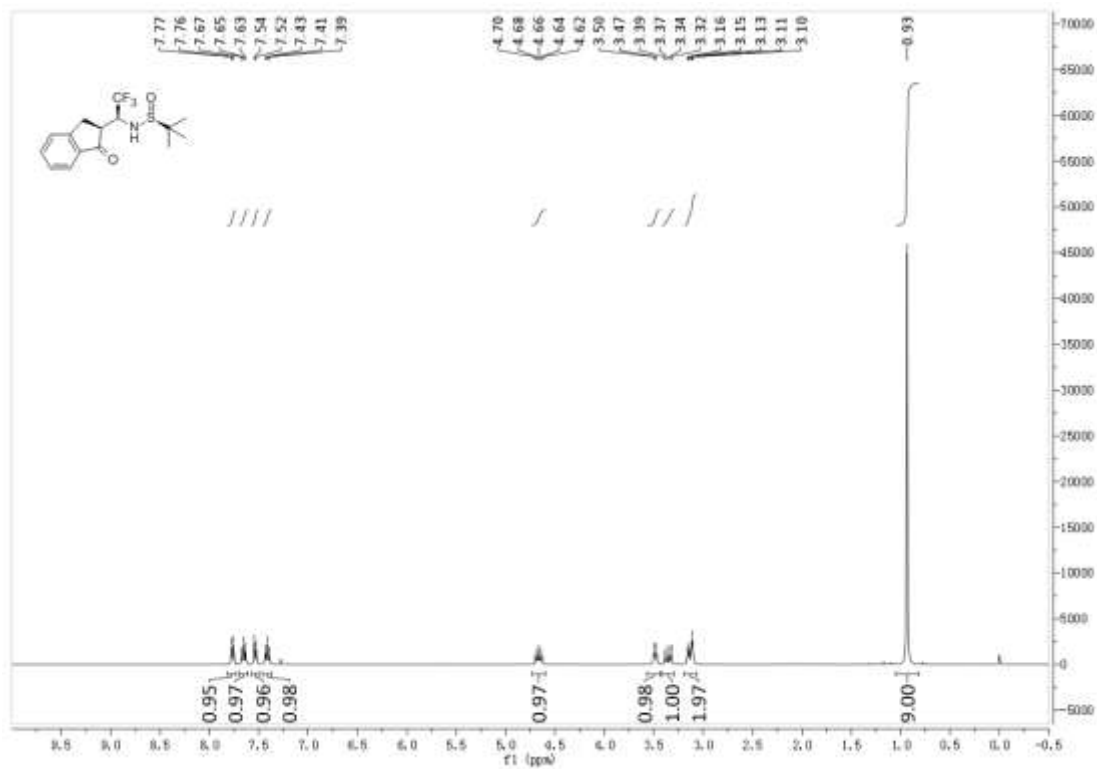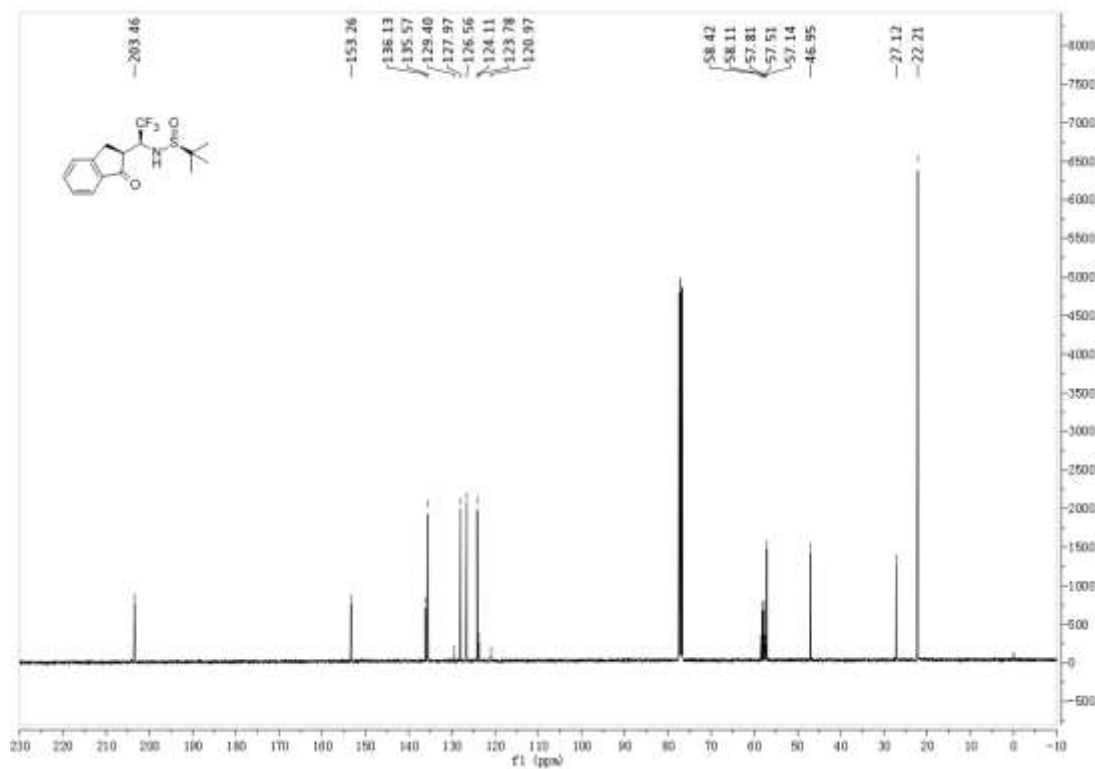

$^1\text{H}$  NMR and  $^{13}\text{C}$  NMR spectrum of **3b**

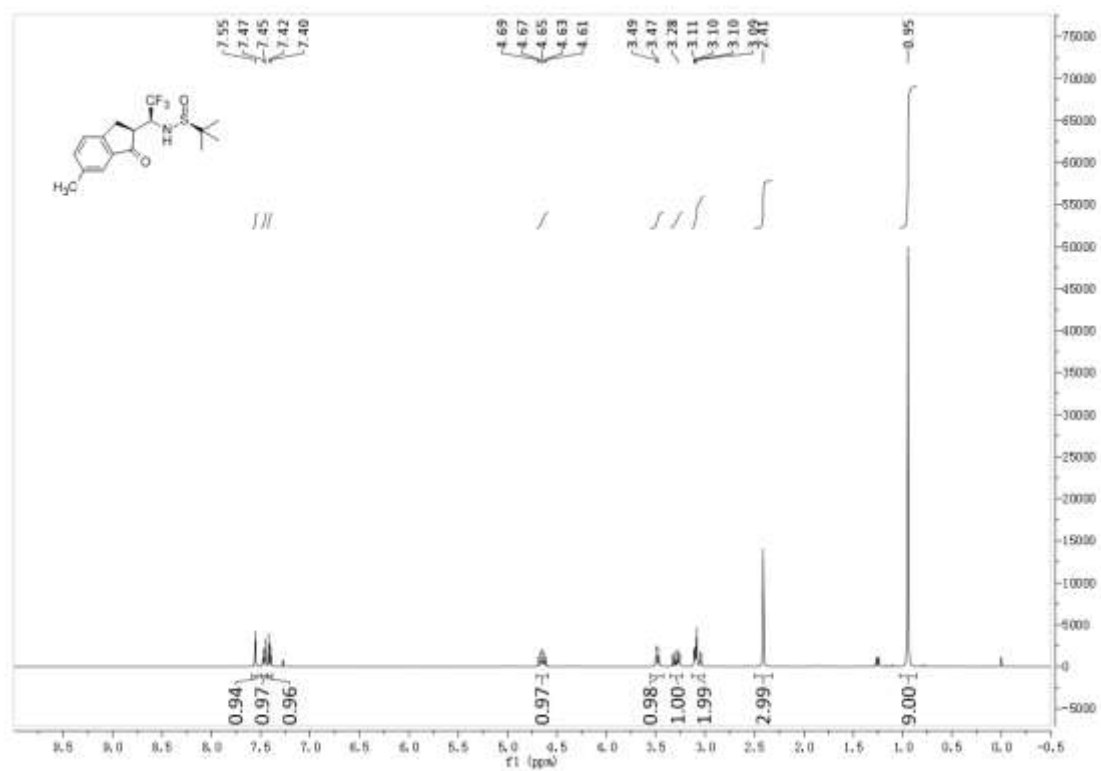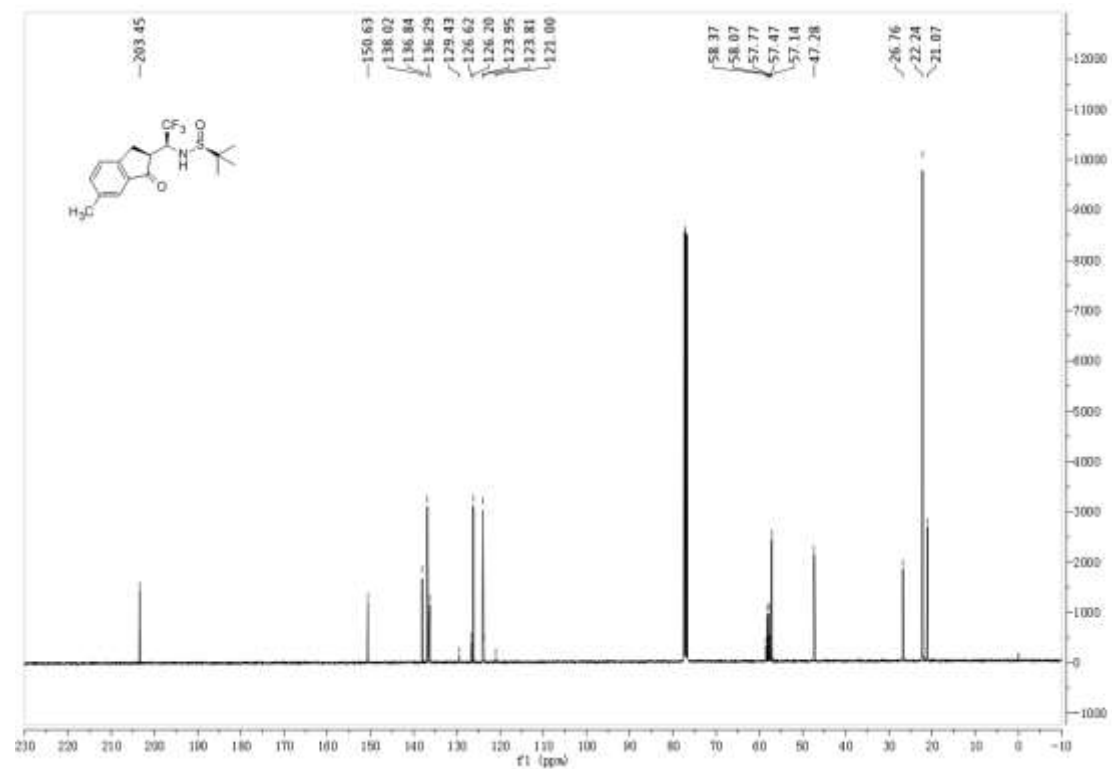

$^1\text{H}$  NMR and  $^{13}\text{C}$  NMR spectrum of **3c**

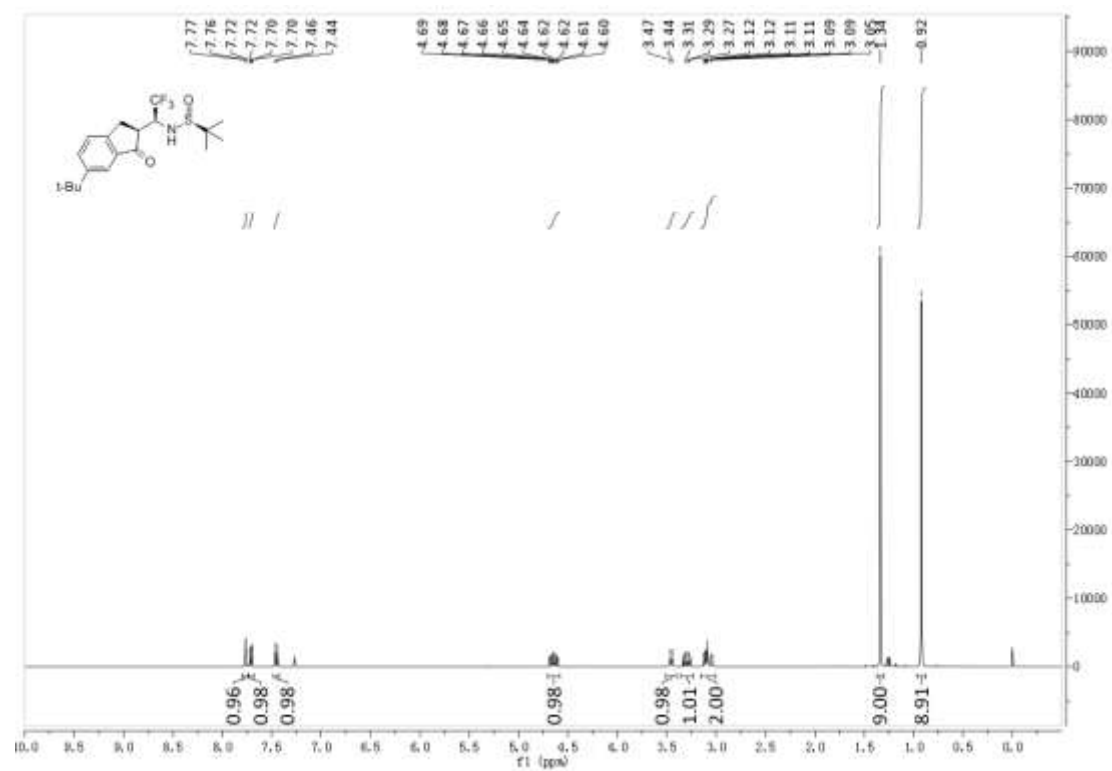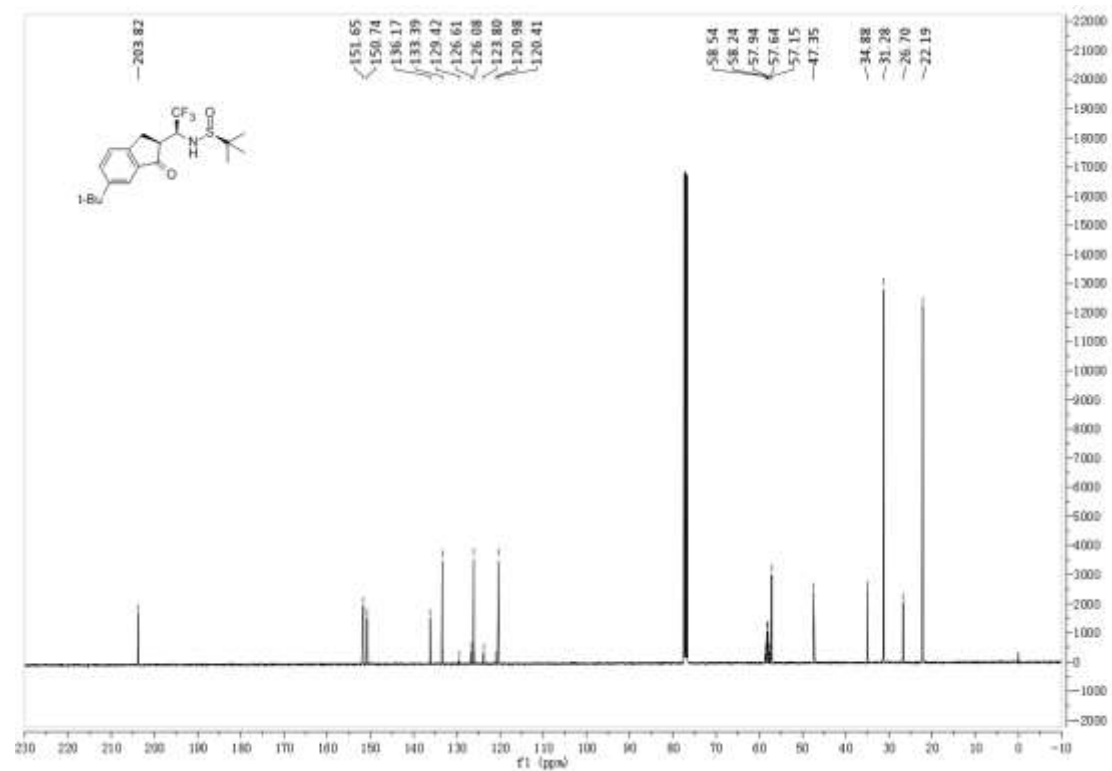

$^1\text{H}$  NMR and  $^{13}\text{C}$  NMR spectrum of **3d**

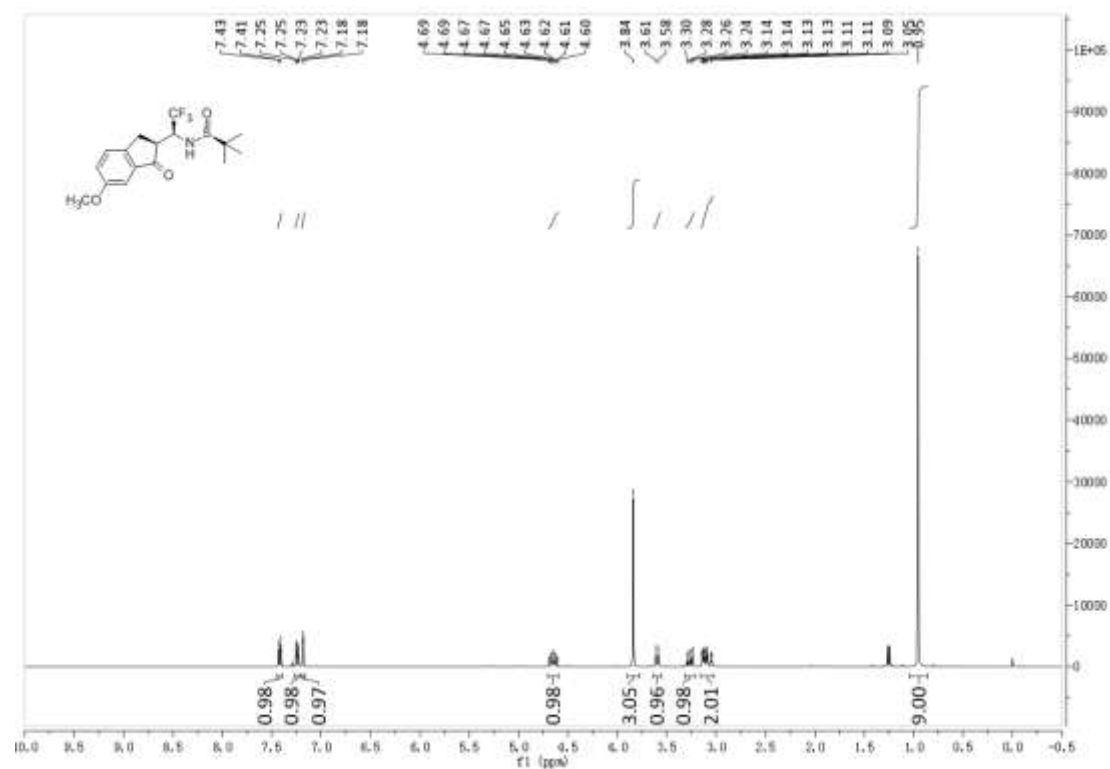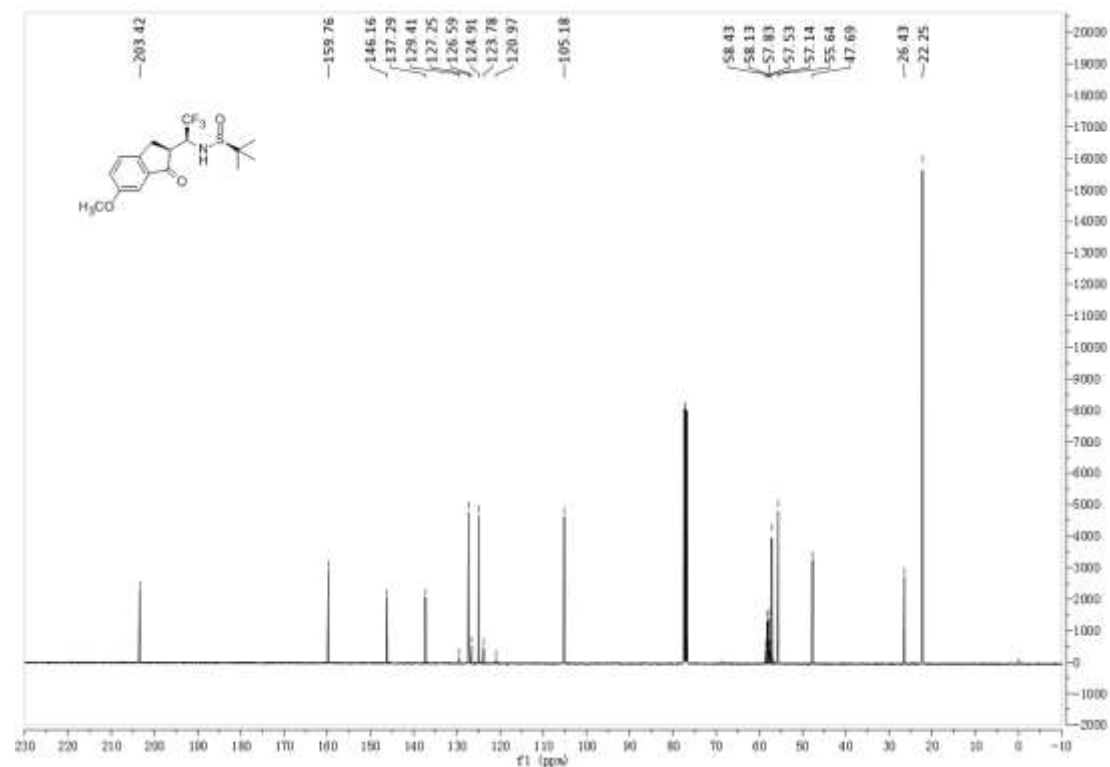

$^1\text{H}$  NMR and  $^{13}\text{C}$  NMR spectrum of **3e**

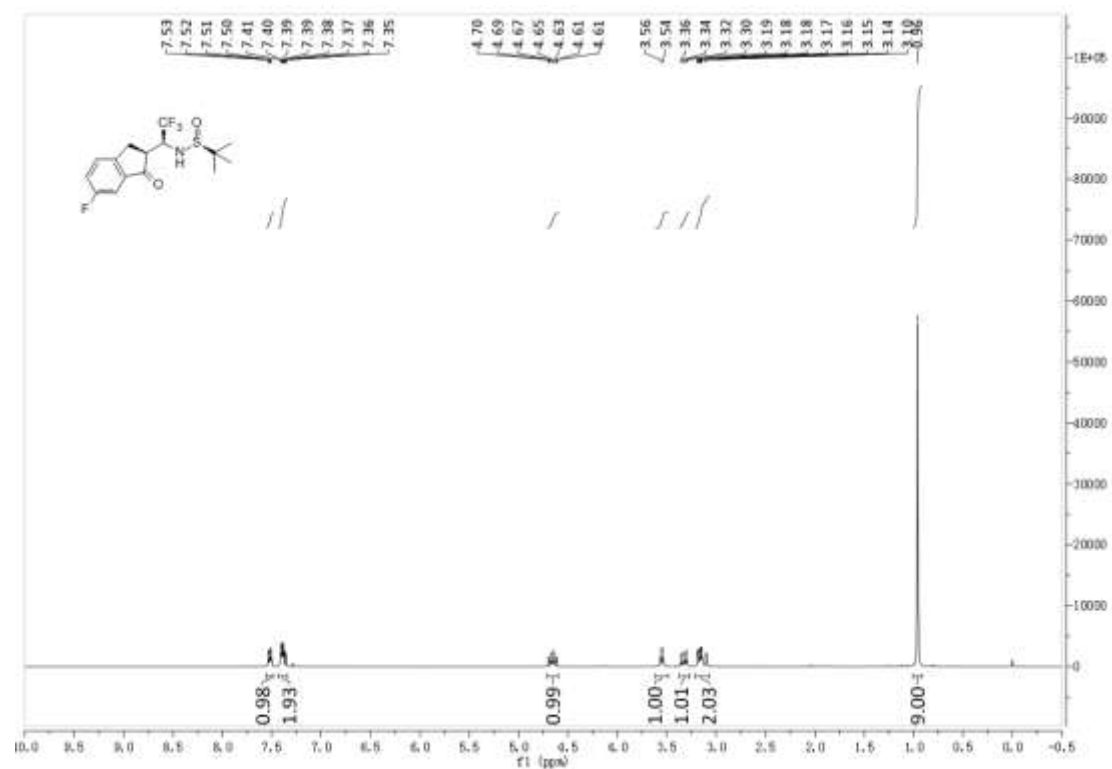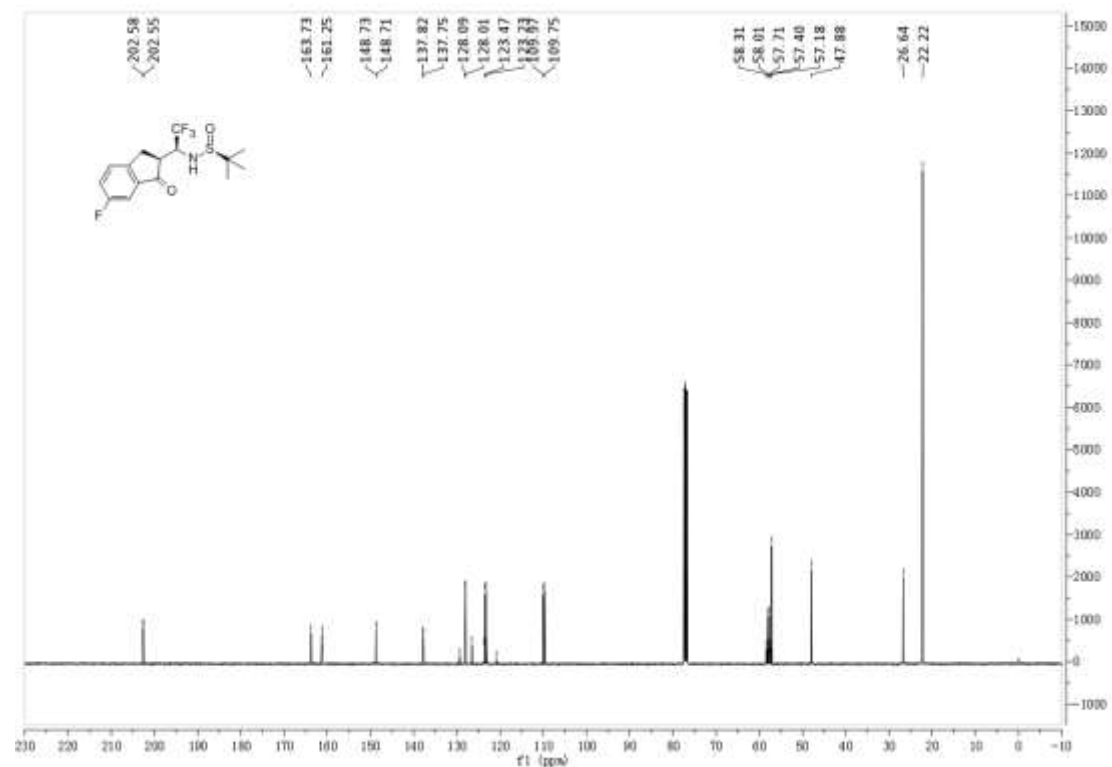

$^1\text{H}$  NMR and  $^{13}\text{C}$  NMR spectrum of **3f**

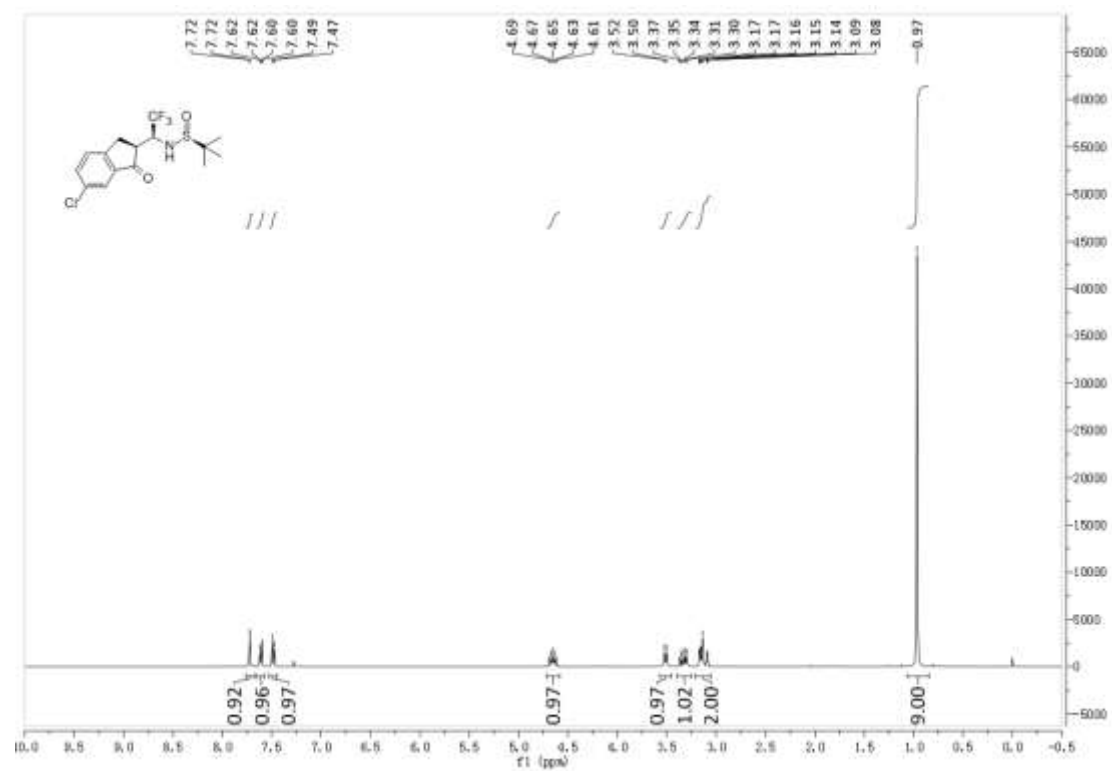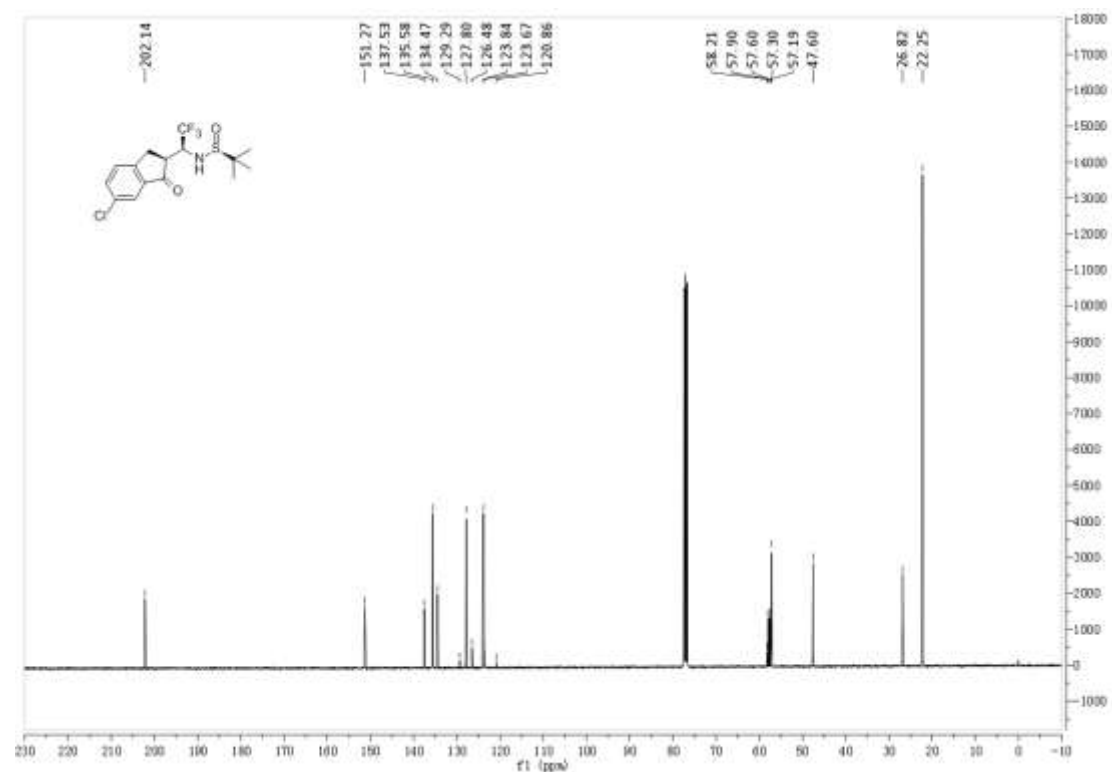

$^1\text{H}$  NMR and  $^{13}\text{C}$  NMR spectrum of **3g**

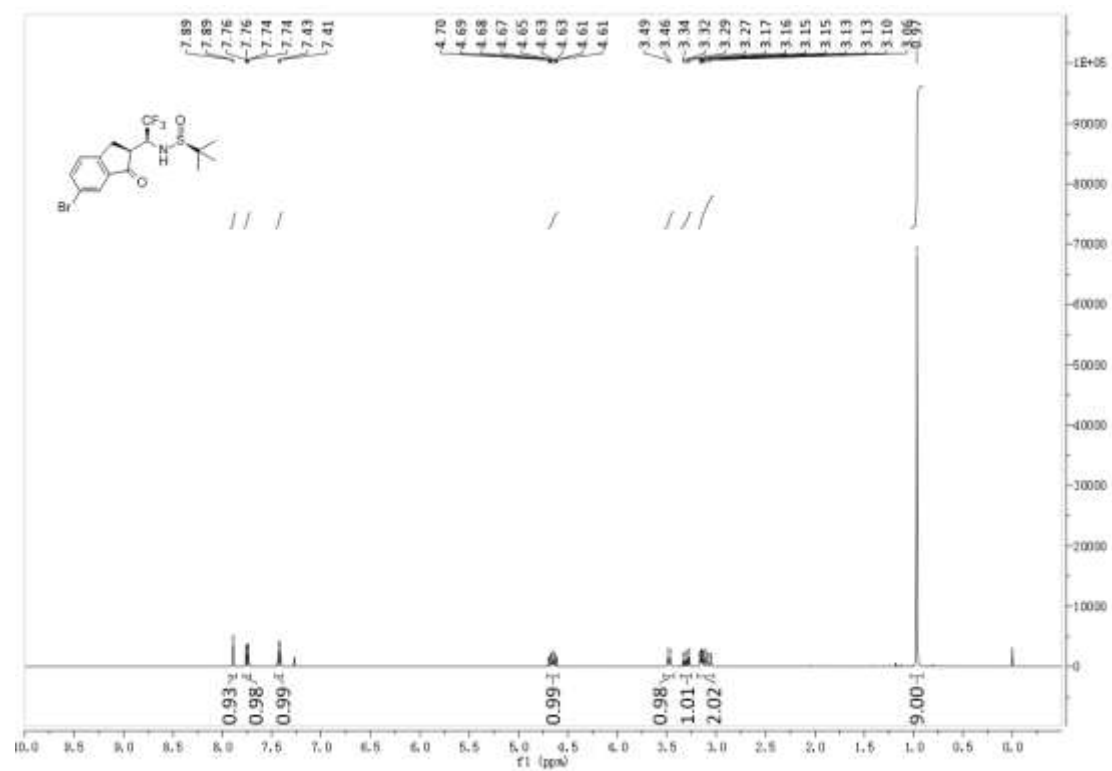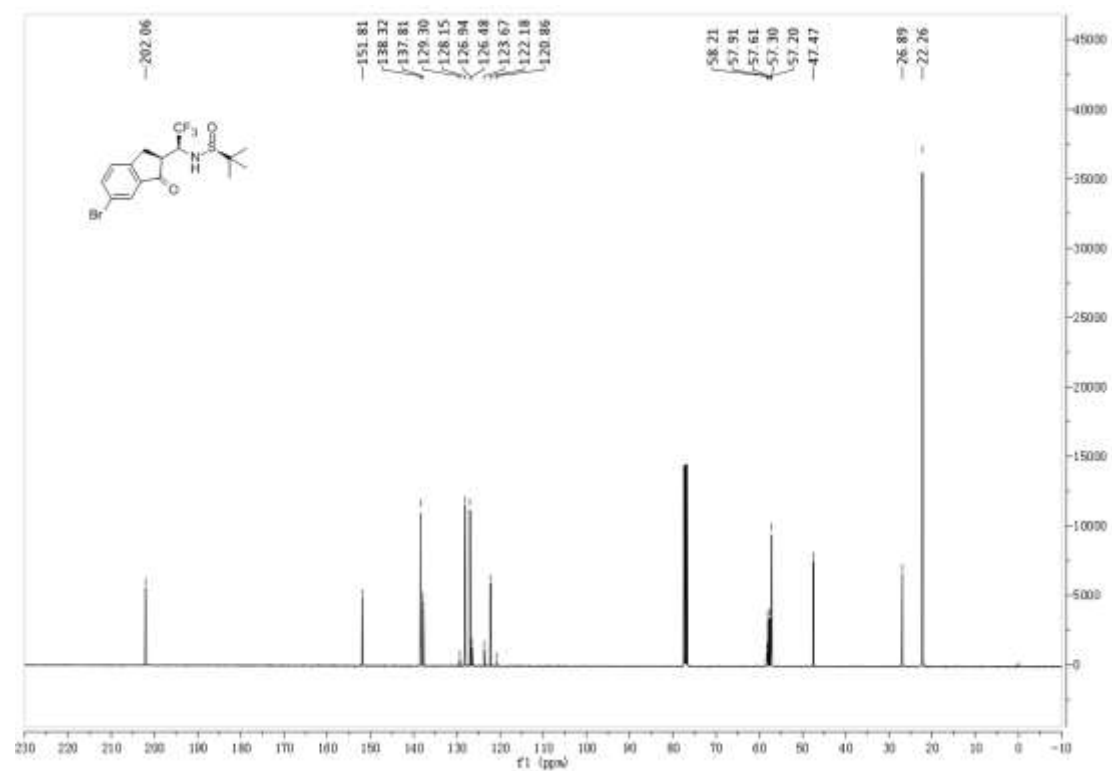



$^1\text{H}$  NMR and  $^{13}\text{C}$  NMR spectrum of **3h**

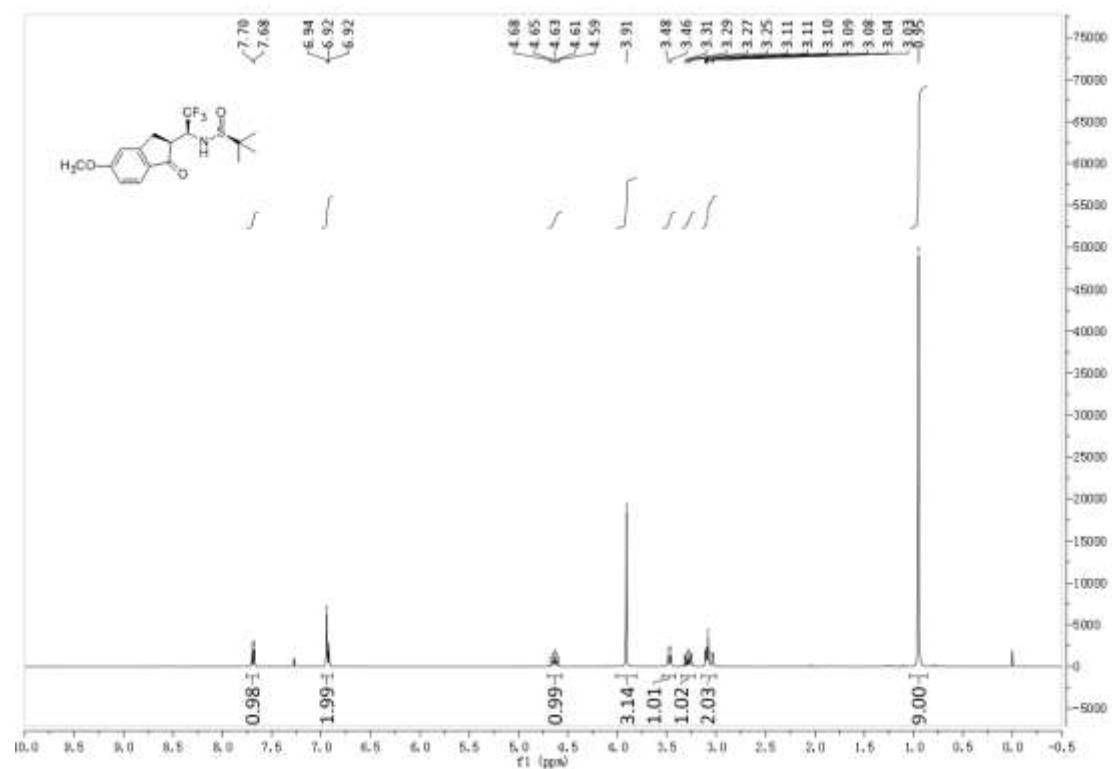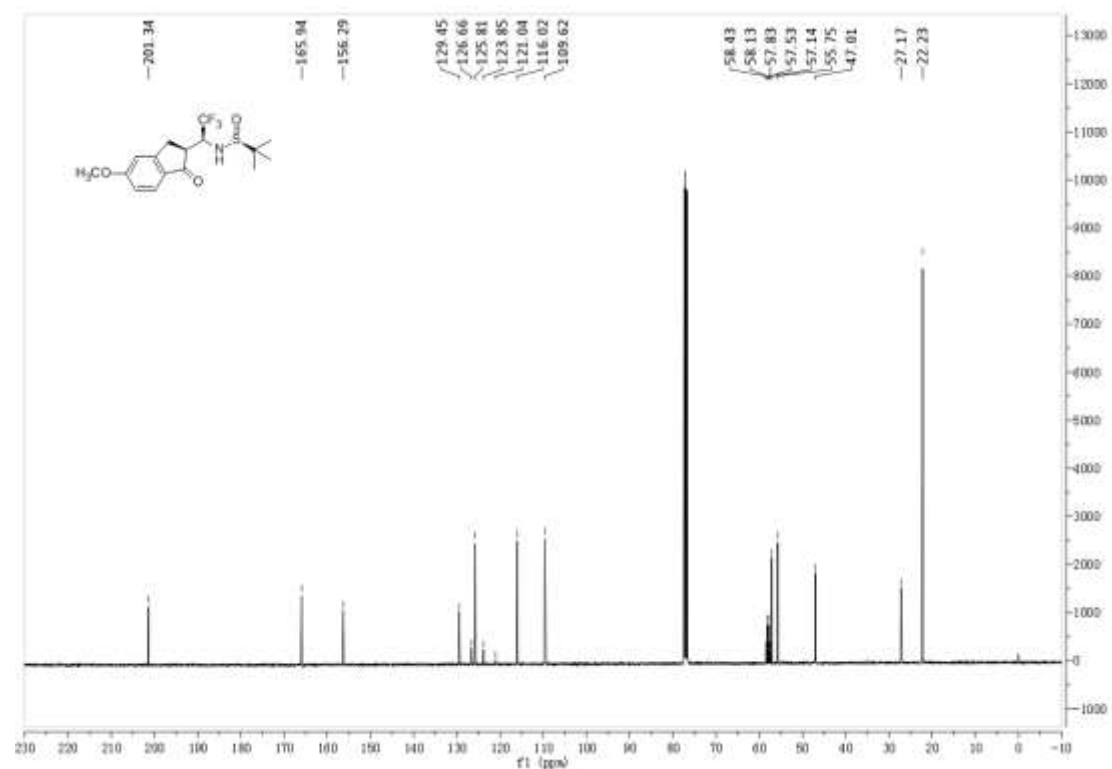

$^1\text{H}$  NMR and  $^{13}\text{C}$  NMR spectrum of **3i**

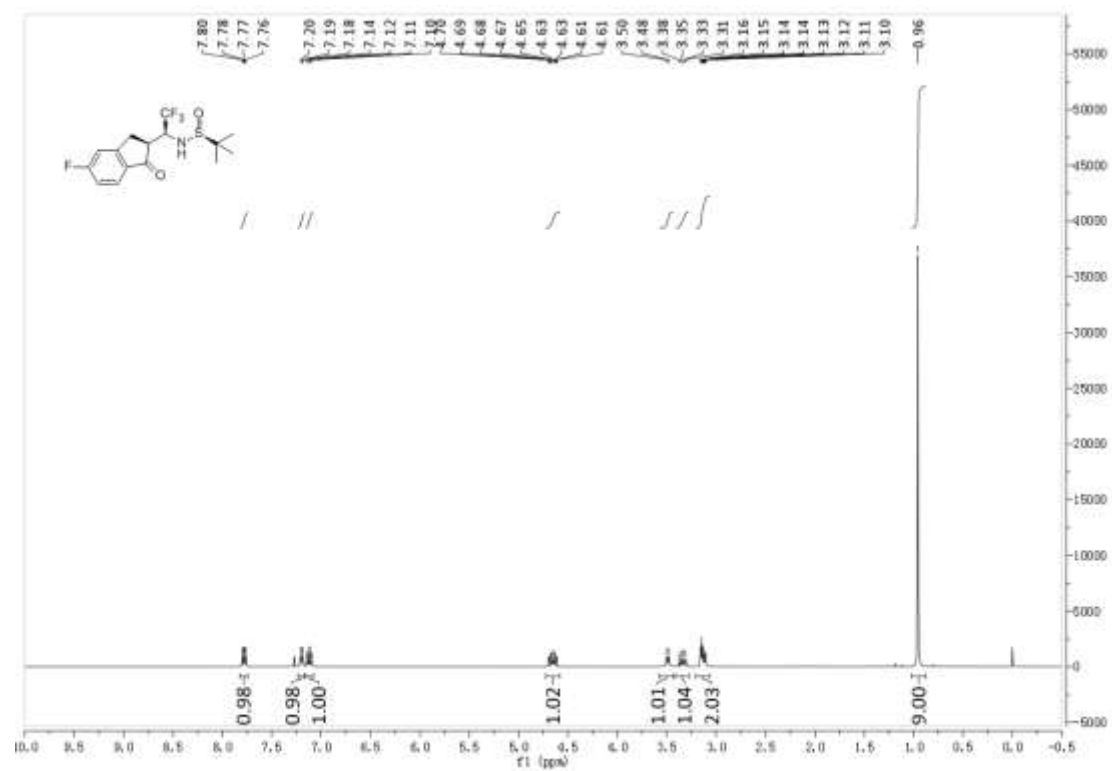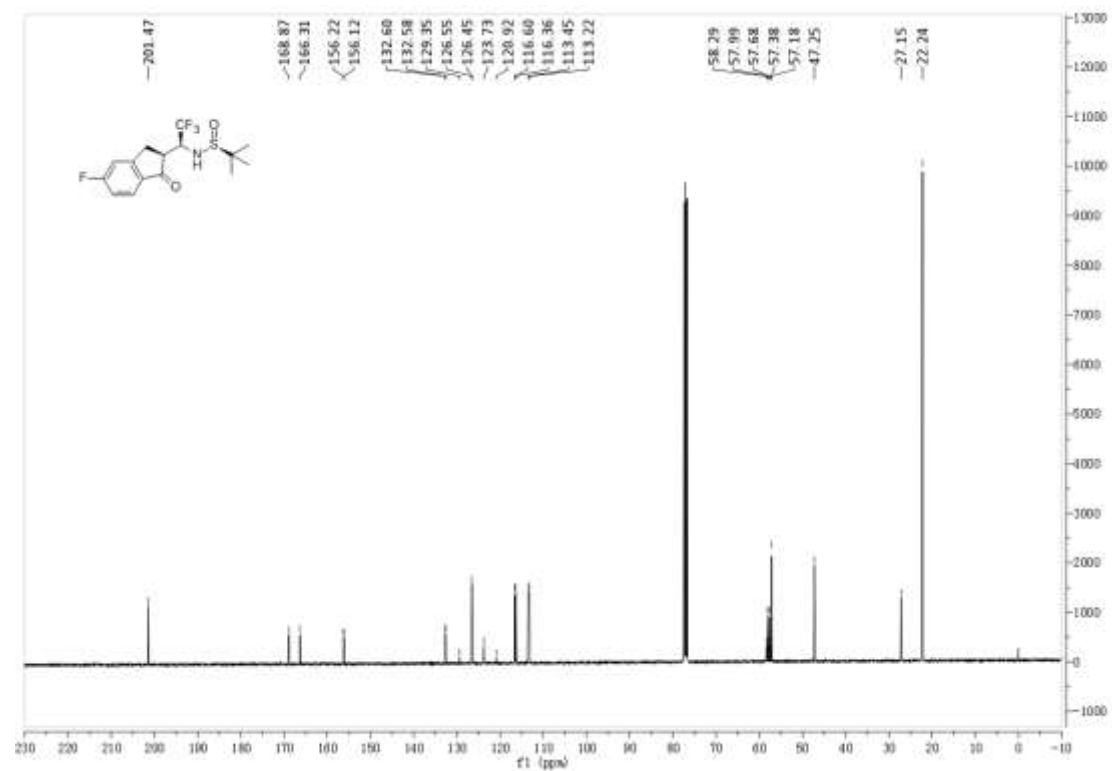

$^1\text{H}$  NMR and  $^{13}\text{C}$  NMR spectrum of **3j**

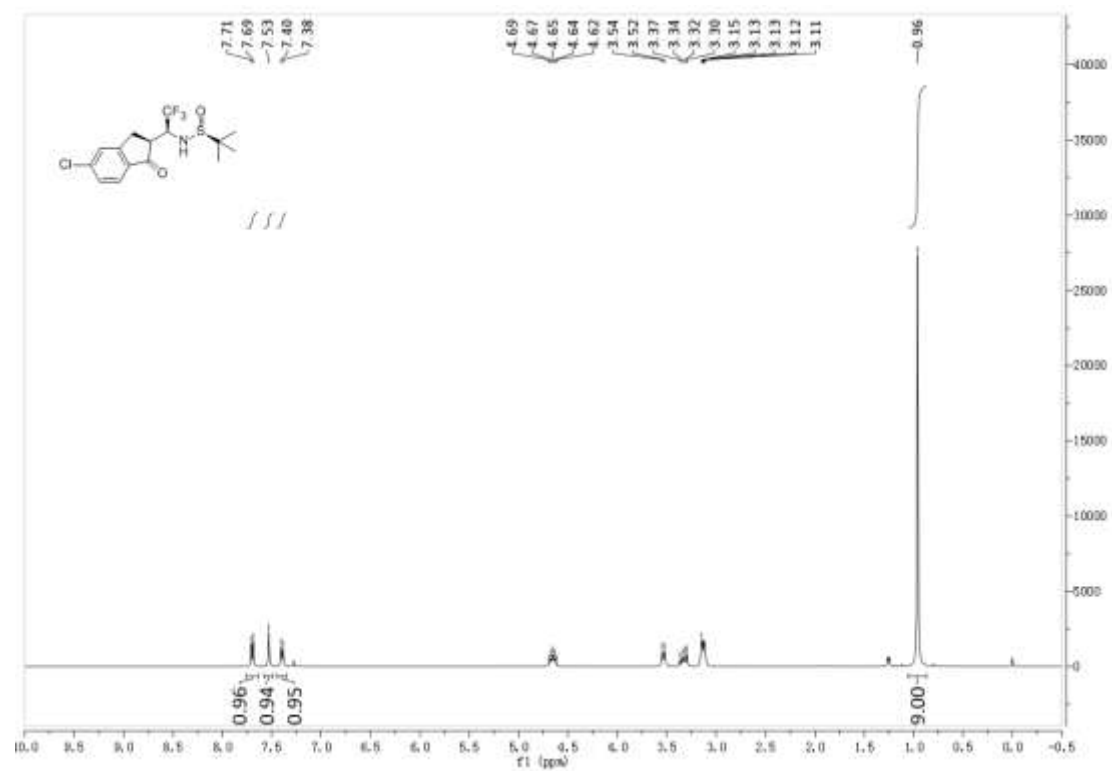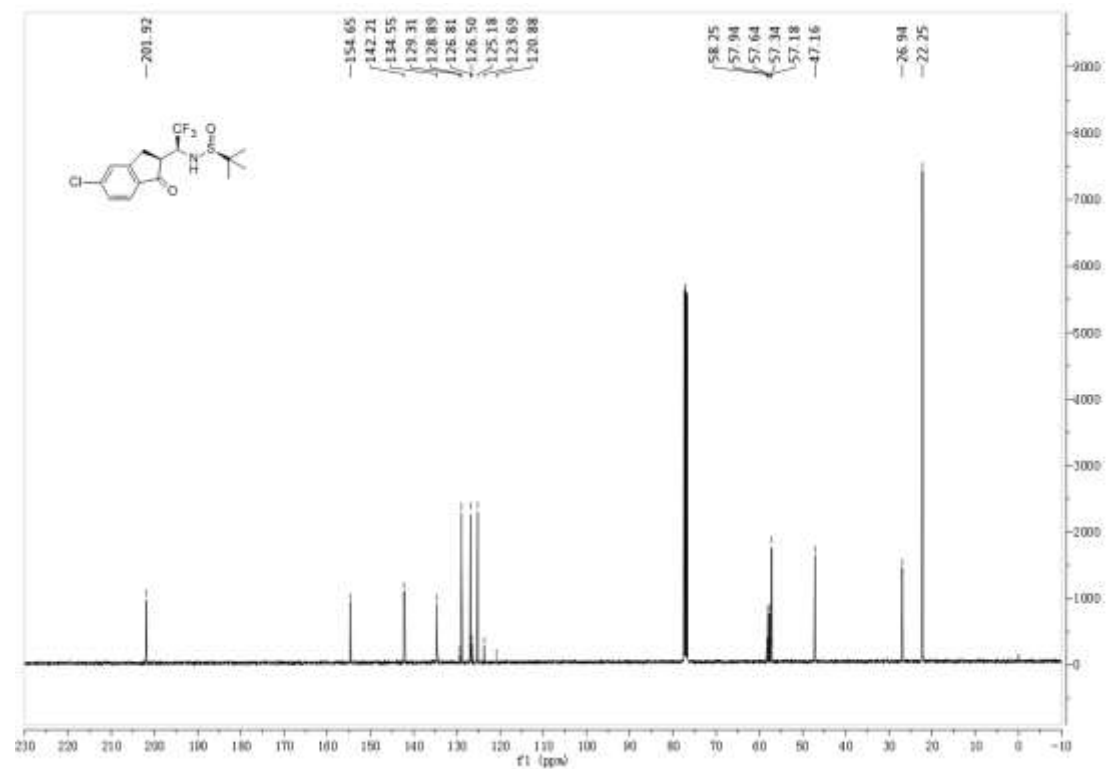

$^1\text{H}$  NMR and  $^{13}\text{C}$  NMR spectrum of **3k**

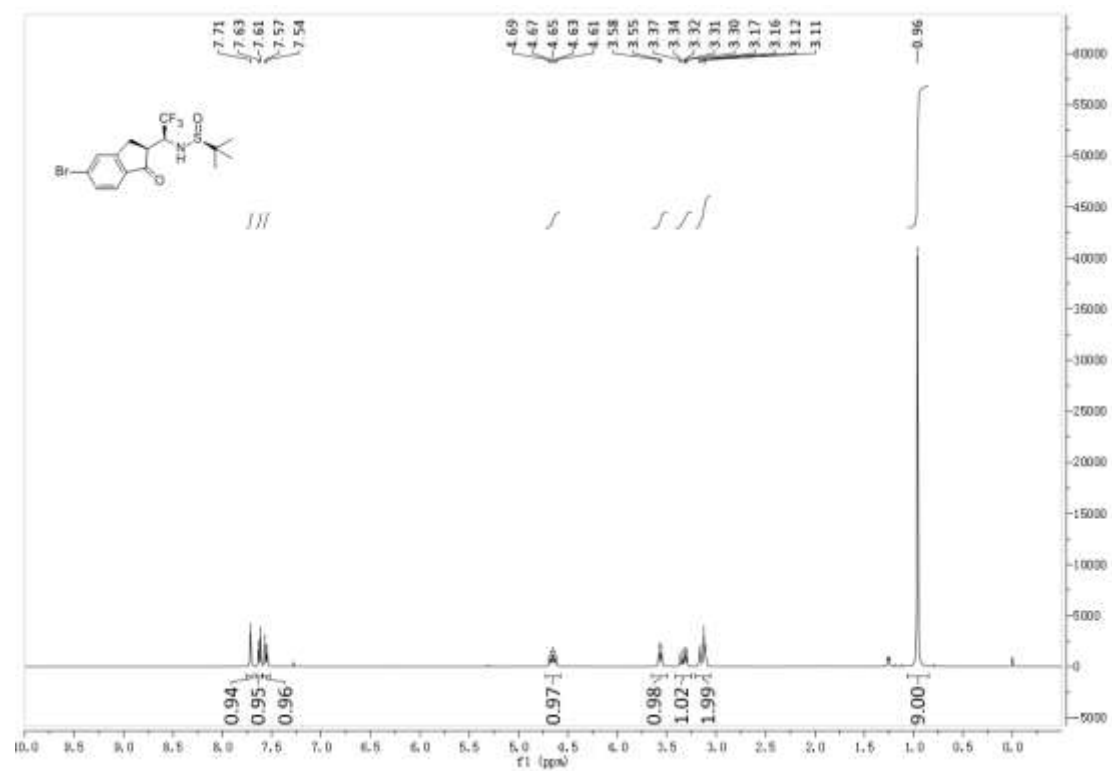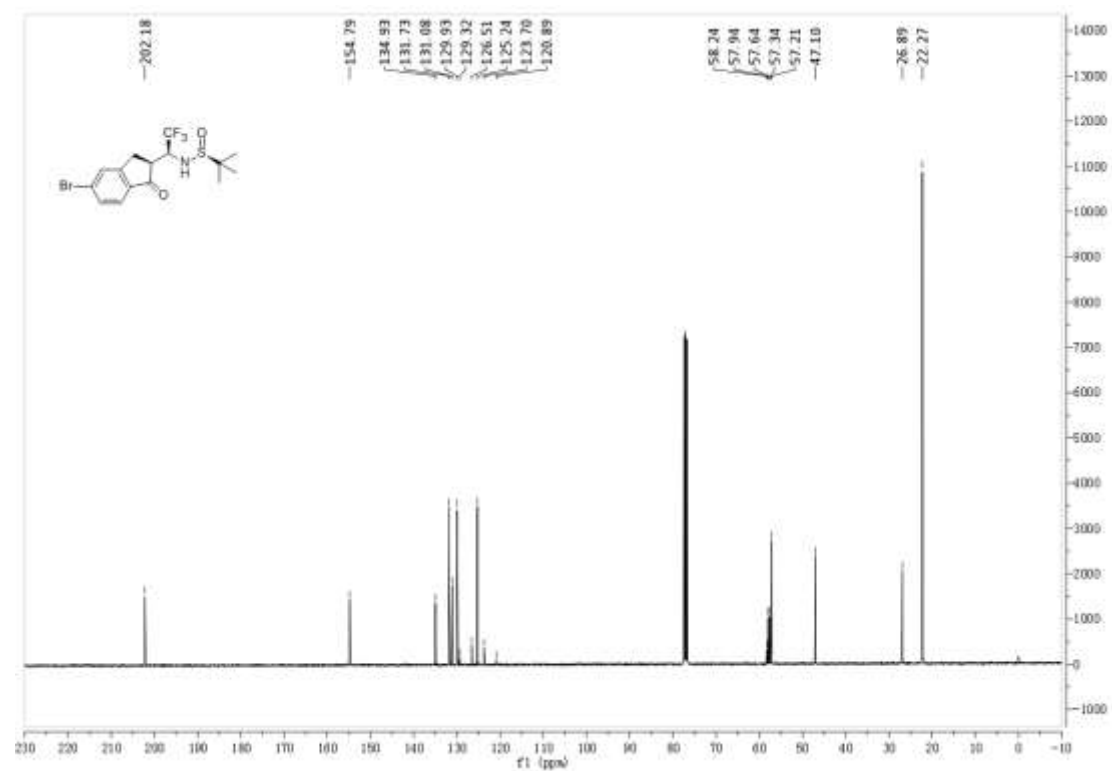

$^1\text{H}$  NMR and  $^{13}\text{C}$  NMR spectrum of **31**

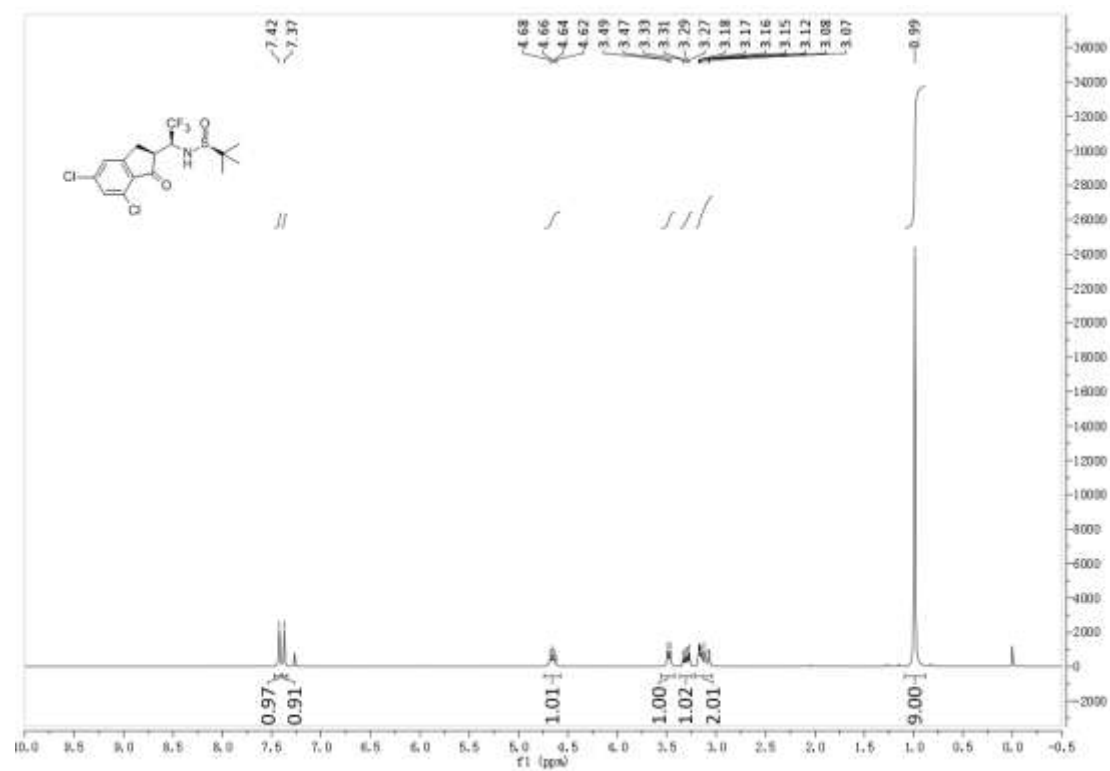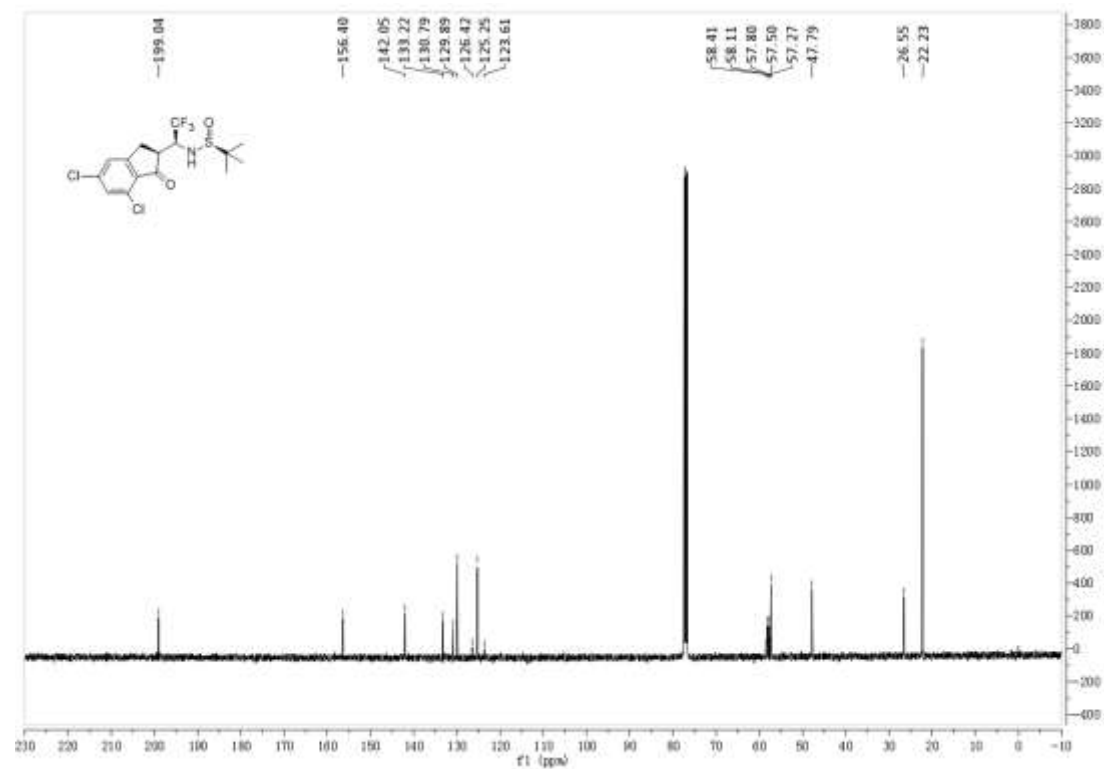

$^1\text{H}$  NMR and  $^{13}\text{C}$  NMR spectrum of **3m**

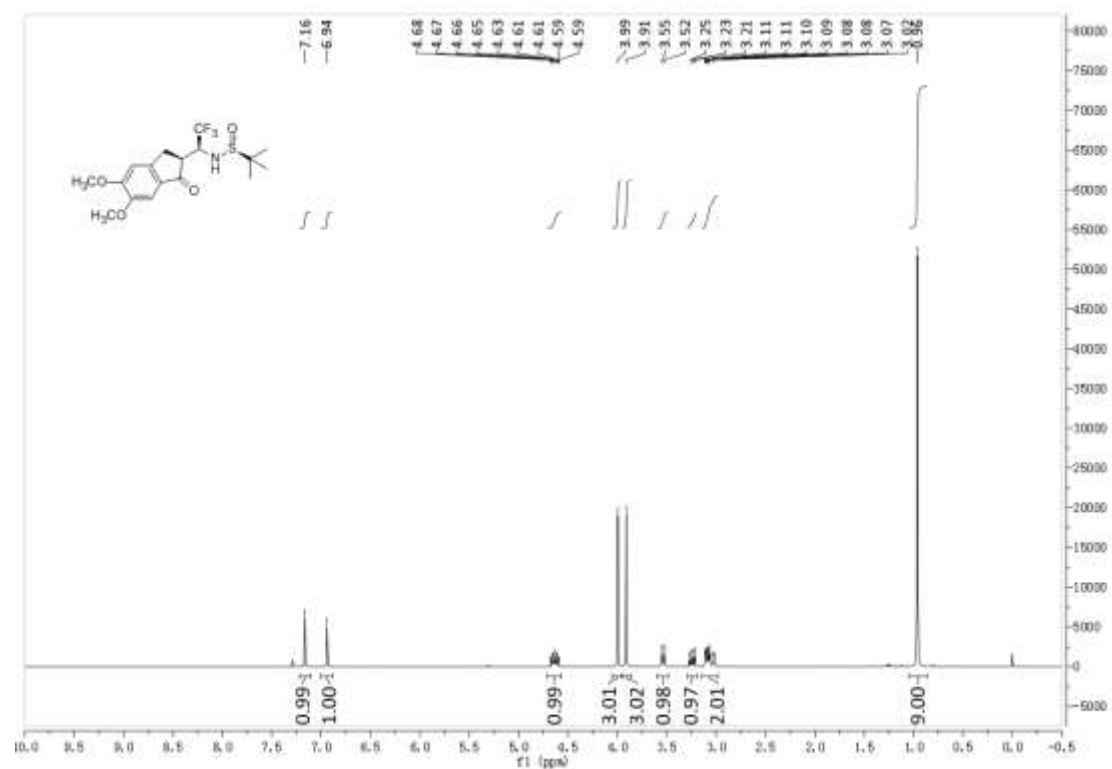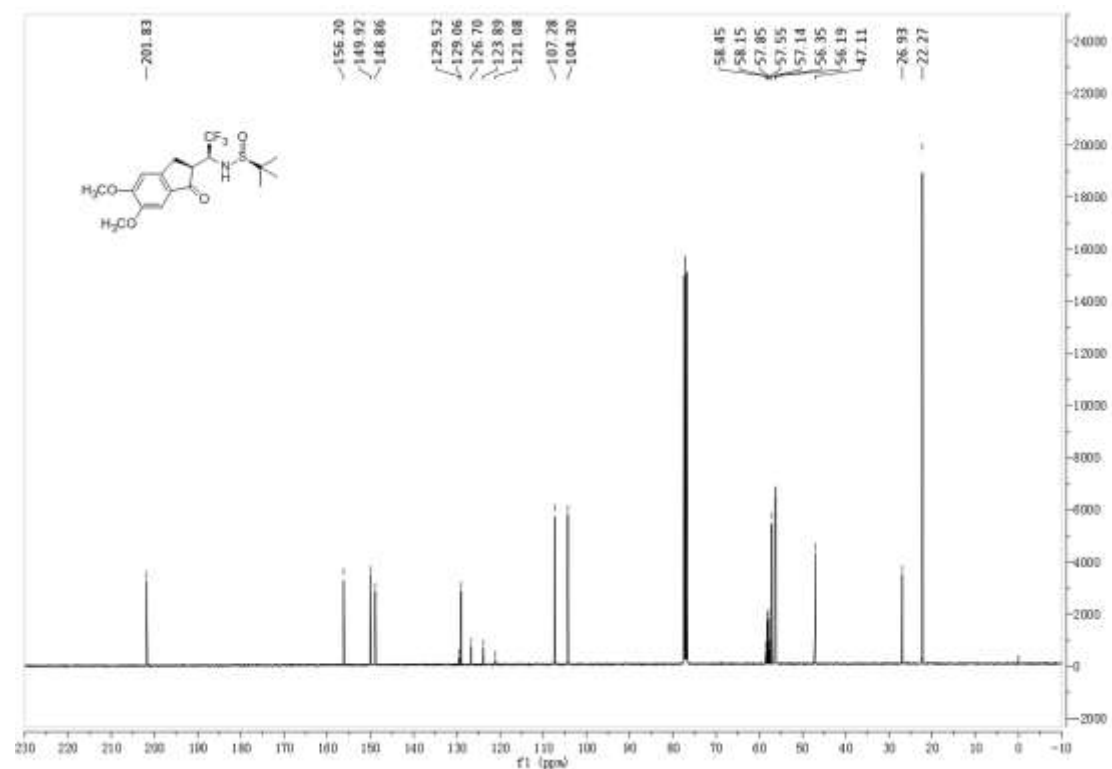

$^1\text{H}$  NMR and  $^{13}\text{C}$  NMR spectrum of **4a**

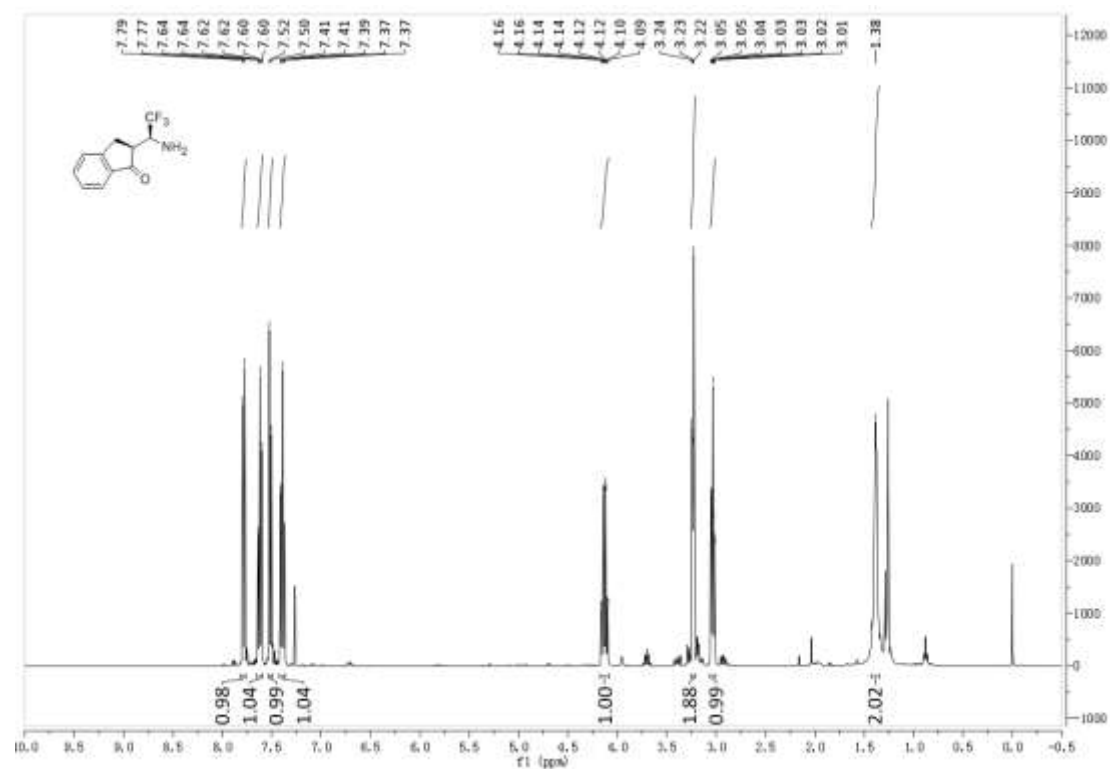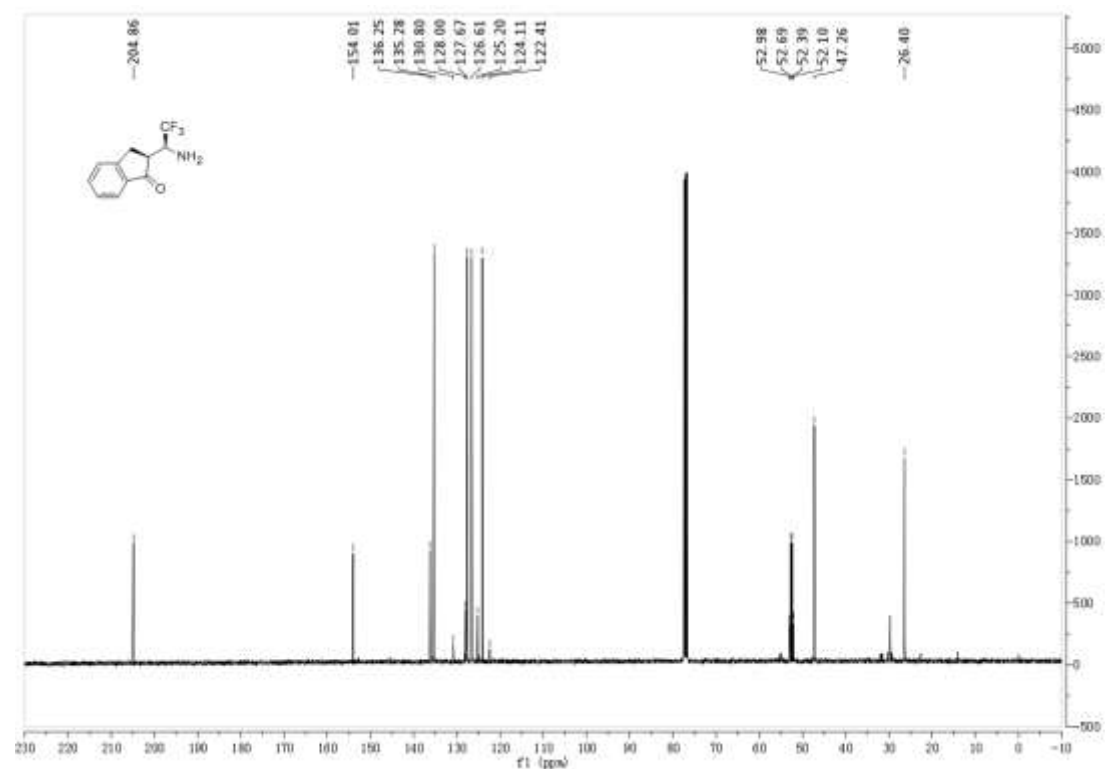

Supplement: c3ra45773g.pdf [file c3ra45773g.pdf]
